1           **Additive and synergistic effects of arbuscular mycorrhizal fungi, insect**  
2           **pollination and nutrient availability in a perennial fruit crop**

3  
4   Ke Chen, David Kleijn, Jeroen Scheper, Thijs P.M. Fijen

5   *Plant Ecology and Nature Conservation Group, Wageningen University, Droevendaalsesteeg 3a,*  
6   *6708PB, Wageningen, The Netherlands*

7  
8   **Abstract**

9   Managing ecosystem services may reduce the dependence of modern agriculture on  
10 external inputs and increase the sustainability of agricultural production. Insect  
11 pollinators and arbuscular mycorrhizal fungi (AMF) provide vital ecosystem services  
12 for crop production, but it remains unknown whether their effects on crop yield  
13 interact and how their effects are influenced by nutrient availability. Here we use  
14 potted raspberry (*Rubus idaeus* L.) plants in a full-factorial randomized block design  
15 to assess the interacting effects of insect pollination, AMF inoculation and four levels  
16 of fertilizer application. AMF inoculation increased the per-plant flower number by 33%  
17 and fruit number by 35%, independently from insect pollination and fertilizer  
18 application. Single berry weight furthermore increased more strongly with fertilizer  
19 application rates in AMF inoculated plants than in non-inoculated plants. As a  
20 consequence, AMF inoculation boosted raspberry yield by 43% compared to non-  
21 inoculated plants. Fruit yield of pollinated plants increased more strongly with  
22 fertilizer application rate than the yield of plants from which pollinators had been  
23 excluded. At maximum nutrient availability, the combined benefits of both ecosystem  
24 services resulted in a 135% higher yield than that of fertilizer-only treatments. Our  
25 results suggest that benefits of ecosystem services on yield can be additive or  
26 synergistic to the effects of conventional management practices. Intensive, high-input  
27 farming systems that do not consider the potential adverse effects of management on  
28 ecosystem service providing species may risk becoming limited by delivery of  
29 ecosystem services. Pro-actively managing ecosystem services, on the other hand, has  
30 the potential to increase crop yield at the same level of external inputs.

31 **Keywords:** Ecosystem services; Interaction; Pollination; Arbuscular mycorrhizal fungi;

32 **Fertilizer**

## 33 **1. Introduction**

34 Agriculture depends on a wide array of ecosystem services (Costanza *et al.* 1997;  
35 Klein *et al.* 2007), but agricultural inputs like fertilizer have adverse effects on the  
36 species providing those services and on the wider environment (Bakhshandeh *et al.*  
37 2017). Ecological intensification has been put forward as a promising way to make  
38 agriculture more sustainable and reduce negative impacts on the environment  
39 (Bommarco *et al.* 2013; Kleijn *et al.* 2019). This approach proposes to manage for  
40 biodiversity to complement or (partially) replace external inputs with production-  
41 supporting ecosystem services. Although ecological intensification is increasingly  
42 being advocated by scientists and policymakers as an environmentally friendly way  
43 towards food security (Pywell *et al.* 2015; IPBES 2016), it is rarely adopted by farmers  
44 (Kleijn *et al.* 2019). Farmers manage complex agro-ecosystems, with the interplay of  
45 several agronomic and environmental factors shaping crop yield. Evidence that a  
46 single ecosystem service has a positive effect on crop yield may not be convincing  
47 enough for farmers to change their day-to-day practices (Dainese *et al.* 2019; Kleijn *et*  
48 *al.* 2019). Ecological intensification might be more appealing to farmers when  
49 multiple ecosystem services together can synergistically enhance crop yield. This  
50 requires insight in the effects of multiple ecosystem services on crop yield  
51 simultaneously, whether and how these services interact and how their benefits are  
52 influenced by conventional agricultural practices. However, we are only just starting to  
53 understand how multiple ecosystem services may interact (Garibaldi *et al.* 2018;  
54 Tamburini *et al.* 2019), and we know even less how these interactions are being  
55 influenced by agricultural management. Here we contribute to addressing this  
56 knowledge gap by examining the interacting effects of aboveground insect pollination  
57 and belowground arbuscular mycorrhizal fungi (AMF) inoculation on crop yield of  
58 raspberry (*Rubus idaeus* L.) and how this is affected by different fertilizer application  
59 levels.

60 AMF are able to form symbiotic associations with about 72% of all vascular terrestrial  
61 plants (Smith & Read 2010; Brundrett & Tedersoo 2018), including the majority of  
62 field crops (Plenchette *et al.* 2005). AMF provide a range of services to plants, such as

63 facilitating mineral nutrient uptake (mainly phosphorus and nitrogen), enhancing  
64 disease resistance and stress tolerance, and improving soil structure (Smith & Read  
65 2010; Chen *et al.* 2018). AMF colonization of crop plants can significantly increase  
66 crop yield (Zhang *et al.* 2019). However, current agricultural practices, such as high  
67 fertilizer inputs and tillage, are likely to inhibit AMF growth, and root colonization  
68 may currently be suboptimal in many agricultural systems (Jansa *et al.* 2006). Farmers  
69 may actively manage for increased AMF colonization through reduced tillage (Bowles  
70 *et al.* 2017), or by inoculating the soil or seedlings, but whether this is effective for  
71 crop yield is less studied (Tamburini *et al.* 2020). Interestingly, AMF may also have  
72 indirect effects on crop production as the presence of AMF in plant roots can moderate  
73 the behavior of other service-providing species groups. For example, Gange and Smith  
74 (2005) found that plants with AMF can significantly increase pollinator visit frequency,  
75 which indicates that AMF and pollinator service delivery may interactively shape crop  
76 yield (Wolfe *et al.* 2005; Saini *et al.* 2019). However, AMF may also provide  
77 disservices to the host plant's growth and development, for example by reducing  
78 phosphor uptake (Smith *et al.* 2004). Whether the net balance of AMF inoculation is  
79 positive for raspberry crop yield, and how this varies under different levels of fertilizer  
80 application is unknown.

81 Pollinators are important ecosystem service-providers as they contribute to 35% of the  
82 global food production, and enhance yields in two-thirds of global crops (Klein *et al.*  
83 2007). Pollination may alter a number of interrelated qualitative and quantitative yield  
84 parameters such as fruit/seed set and size (Bommarco *et al.* 2012; Fijen *et al.* 2018).  
85 However, the positive effect of pollination on a particular yield parameter does not  
86 automatically result in a higher total crop yield. For example, in sunflower (*Helianthus*  
87 *annuus* L.) increasing insect pollination can contribute to higher seed set but with  
88 smaller seeds (Tamburini *et al.* 2017) resulting in the same overall yield, probably  
89 because yield is constrained by other factors, such as nutrient availability (Garibaldi *et*  
90 *al.* 2018). Particularly for high-revenue fruit crops like raspberry (Daubeny & Kempler  
91 2003), both yield quantity and quality are important for farmers. To make more  
92 reliable predictions of the benefits of ecological intensification for agriculture, it is  
93 therefore important to gain insight in how effects of insect pollination shape crop yield

94 through these intercorrelated yield parameters, and how this is affected by other  
95 ecosystem services such as those provided by AMF, or management practices such as  
96 fertilizer application.

97 Here, we experimentally manipulated insect pollination, AMF inoculation and nutrient  
98 availability on raspberry crop plants in a full-factorial randomized block design to test  
99 the potential interactive effect on yield of AMF inoculation and insect pollination at  
100 different levels of fertilizer application which, to our knowledge, has not been studied  
101 before. The main objectives of this study were (i) to test the effects of AMF  
102 inoculation and fertilizer application rates on pollinator visitation, (ii) to examine the  
103 effects of pollination and AMF inoculation on five yield quality and quantity  
104 parameters and how their effects are influenced by fertilizer application, and (iii) to  
105 explore the pathways explaining the relationships among the variables. The insights  
106 obtained in our study may help advance our understanding of whether and how we can  
107 integrate different ecosystem service into farming practices to make agriculture more  
108 sustainable.

109

## 110 **2. Materials and methods**

### 111 (a) Study system

112 We used raspberry as our study crop, which is an increasingly important fruit crop  
113 with a global production value of \$1.5 billion in 2018 (FAO 2018). We used the  
114 cultivar '*Tulameen*', which is among the most popular raspberry cultivars worldwide  
115 due to its high marketable quality, mainly the appearance and flavour (Aprea *et al.*  
116 2009). It is a self-compatible cultivar, but high-quality fruit production nevertheless  
117 benefits from visitation by insect pollinators (Daubeny & Kempler 2003; Chen *et al.*  
118 2021). The study was carried out on an experimental field of Wageningen University  
119 & Research in Wageningen, the Netherlands (51° 59' 47" N, 5° 39' 36" E; 780 mm  
120 mean annual precipitation, 9.4 °C mean annual temperature).

## 121 (b) Experimental design

122 In August 2019, we purchased raspberry plants with a height of ca. 60 cm from a local  
123 fruit tree supplier. To ensure that all plants were exposed to the same soil conditions,  
124 we carefully washed away any soil adhering to the roots of raspberry plants prior to  
125 transplanting. Each plant was then planted into a 10-litre plastic pot (upper diameter 28  
126 cm, holes in the bottom for drainage but covered with root cloth to minimize root  
127 growth out of the pot), and filled with un-sterilized former agricultural soil (SOM  
128 content: 1.95%, available N: 14.0 mg/kg, available P: 0.6 mg/kg, available K: 19.4  
129 mg/kg). Soils were not sterilized to reflect real-world conditions in agricultural fields  
130 where plants can be colonized by AMF already present in the agricultural soil.

131 As our AMF treatment, we added either alive inoculum (inoculated) or sterilized  
132 inoculum (non-inoculated). We used the commercially available *Rhizophagus*  
133 *intraradices* inoculum (MYKOS<sup>®</sup> Xtreme Gardening, Canada). To sterilize the  
134 inoculum for our non-inoculated treatment, we autoclaved it at 121 °C for two hours  
135 (Changey *et al.* 2019). During transplantation, we gave each plant two tablespoons of  
136 inoculum or sterilized inoculum spread evenly on the roots.

137 The fertilizer treatments comprised four levels: 0, 33, 66 and 99 kg ha<sup>-1</sup> of N per year.  
138 The fertilizer levels were selected to include the range from no to optimum N inputs,  
139 as the recommended annual fertilizer N application rates range from 45 to 85 kg/ha  
140 (Strik 2005). The annual dose was divided into three applications: the first one-third  
141 two weeks after transplanting (October 30, 2019), the second one-third at bud break  
142 (March 16, 2020) and the last one-third just before flower opening (April 24, 2020).  
143 We selected a local commonly used fertilizer for the experiment, containing 10.80% N,  
144 13.44% K, 5.89% P, and 7.20% S (CropSolutions Co., Perth, UK).

145 This site is known to host pollinators, mainly wild bumblebees and managed honey  
146 bees, in sufficient densities to result in an optimal fruit set of raspberry plants (Chen *et*  
147 *al.* 2021). To examine the effect of insect pollination, we excluded pollinators from  
148 half of the plants and used open-pollinated plants as positive controls. We covered  
149 every plant of the pollinator exclusion treatments with a white semi-transparent mesh  
150 bag (mesh size 0.1 mm) before the onset of flowering and kept plants covered

151 throughout the flowering period. The mesh bags allowed wind pollination but  
152 excluded all insect visitors. To avoid predation of the developing fruits, we covered all  
153 plants after flowering with the mesh bags until harvest.

154 We used a complete randomized block design with AMF (two levels), pollination (two  
155 levels) and fertilizer (four levels) fully crossed to measure their individual and  
156 interacting effects on raspberry productivity. This resulted in 16 treatment  
157 combinations, which were randomly assigned to individual raspberry plants and  
158 replicated in five blocks, bringing the total to 80 experimental plants. Potted plants  
159 were spaced one meter apart both within and between rows and dug into the soil to  
160 protect the roots from extreme temperatures. All plants received equal and ample  
161 irrigation, and weeds were regularly removed by hand.

#### 162 (c) Measurements

163 For each plant of the open pollination treatment, we conducted ten-minute pollinator  
164 censuses from May 12 to 27<sup>th</sup> to see if the AMF and fertilizer treatments affected the  
165 pollinator visitation rate. We randomly observed plants ten times on different days  
166 (morning or afternoon), and only during sunny or slightly cloudy days and with low  
167 wind velocity, following the focal point observation method (Fijen & Kleijn 2017).  
168 We only recorded flower visitors that contacted anthers or stigmas of flowers. All  
169 flower visitors were identified on the wing.

170 From June 15 onward, we harvested ripe berries every other day and weighed each  
171 berry. Additionally, we counted the wilted and aborted flowers of each plant.

#### 172 (d) Data analysis

173 Four plants died over winter prior to fruit production, resulting in a dataset for 76  
174 plants (Supplementary Table 1). Prior to analyses, single berry weight was averaged  
175 per plant to avoid pseudoreplication. Total flower number per plant was calculated as  
176 the sum of the total fruit number and the total number of flowers that did not develop  
177 into fruits (e.g. wilted or aborted flowers). Per-plant fruit set was calculated by  
178 dividing the fruit number by the total flower number and expressed as a percentage.

179 We fitted linear mixed-effects models to quantify the relations between the  
180 experimental treatments and response variables. We fitted separate full models for

181 each of the response variables flower number, fruit number, fruit set (%), single berry  
182 weight (g/fruit) and total yield (g/plant), and included "block" as a random factor in all  
183 models. Independent variables included pollination, AMF inoculation, fertilizer  
184 application rate and their interactions. We also included a quadratic term for fertilizer  
185 application rate to test for non-linear relations between fertilizer levels and raspberry  
186 production (Tamburini *et al.* 2017). The full models were simplified by removing non-  
187 significant predictors (backward elimination) using likelihood ratio tests (Zuur *et al.*  
188 2009). We additionally tested the effects of AMF and fertilizer treatments on average  
189 flower-visitor visitation rate (visitors/10 minutes), including the quadratic term for  
190 fertilizer application rate, and their interactions, and "block" as a random factor. For  
191 this analysis we only used the open pollination treatment plants. The models were built  
192 using the function lme() in the nlme package with the maximum likelihood estimation  
193 method (Pinheiro *et al.* 2019). Statistical assumptions of normality and  
194 homoscedasticity of model residuals were inspected visually through diagnostic plots.  
195 All analyses were performed in R (R Core Team 2020).

### 196 **3. Results**

#### 197 (a) Total visits and flower visitation rate

198 Altogether, 682 individual pollinators were observed, divided over seven taxa: *Apis*  
199 *mellifera* (471 individuals), *Bombus terrestris* congl. (132 individuals, cf. Williams *et*  
200 *al.* (2012)), *B. pascuorum* (55 individuals), *B. lapidarius* (13 individuals), *B. pratorum*  
201 (7 individuals), hoverfly (3 individuals) and *B. sylvestris* (1 individual). AMF  
202 inoculation and fertilizer application interactively influenced pollinator visitation rate  
203 (Table 1). Flower visitation rate increased with fertilizer levels, and was higher for  
204 plants that had been inoculated with AMF than for non-inoculated plants at  
205 intermediate fertilizer application rates, but not at low or high fertilizer application  
206 rates (Table 1, Fig. 1). Besides, flower visitation rate was strongly correlated with the  
207 number of flowers per plant (Supplementary Fig. 2).

#### 208 (b) Flower number, fruit set and fruit number

209 The number of flowers per plant increased independently by both factors that  
210 (potentially) influence the nutrient acquisition, i.e. AMF inoculation and fertilizer



211 inputs. Compared to the non-inoculated plants, AMF inoculation increased flower  
212 number by 33% (Fig. 2b, Table 1). Fertilizer inputs linearly increased flower number  
213 (Table 1), with plants receiving 99 kg N·ha<sup>-1</sup> producing 105% more flowers than the  
214 unfertilized plants (Fig. 2a). There was a near-significant interaction (P=0.059)  
215 between the effect of AMF inoculation and the quadratic term of fertilizer application  
216 rate, with AMF inoculated plants receiving intermediate fertilizer application rates  
217 producing the most flowers (Table 1, Supplementary Fig. 1).

218 Fruit set was mainly altered by insect pollination, but pollination benefits were most  
219 pronounced at the higher fertilizer application rates (significant pollination × fertilizer  
220 interaction; Table 1). From the lowest to the highest level, fertilizer application  
221 increased fruit set of open-pollinated plants by 37% and had little effect on fruit set in  
222 bagged plants (Fig. 2c).

223 Fruit number is the product of flower number and fruit set and this was clearly  
224 reflected in our results (Table 1; Fig. 2). AMF inoculation independently increased  
225 fruit number by 35% (Fig. 2f). Additionally, pollination and fertilizer application rate  
226 interactively affected fruit number with open-pollinated plants receiving 99 kg N·ha<sup>-1</sup>  
227 producing 162% more fruits than unfertilized plants. This increase was only 53%  
228 when pollinators were excluded (Table 1; Fig. 2e).

### 229 (c) Single berry weight and yield

230 Increasing fertilizer application rates influenced single berry weight interactively with  
231 AMF inoculation treatments, with a much more pronounced positive response in AMF  
232 inoculated plants compared to the non-inoculated plants (Table 1, Fig. 3). Pollination  
233 treatments did not significantly influence single berry weight (Table 1).

234 The total yield is essentially the product of per-plant fruit number and single berry  
235 weight. However, total yield largely reflected effects of treatments on total fruit  
236 number, albeit stronger, while the significant interaction of AMF inoculation and  
237 fertilizer application on single berry weight was not reflected in the pattern for total  
238 yield (Table 1; Fig. 4). Total yield was positively related to fertilizer application rate,  
239 but these effects were much more pronounced in open-pollinated plants than in plants  
240 from which pollinators had been excluded; plants with insect pollination produced 90%

241 more yield than bagged plants under our highest fertilizer input level. On top of that,  
242 the yield of AMF inoculated plants significantly increased by 43% compared to the  
243 non-inoculated plants (Fig. 4b). Under the highest fertilizer input, raspberry plants with  
244 open pollination and AMF inoculation produced the highest yield, on average 90.4 g  
245 berries, which was 135% more than the yield of plants receiving only the fertilizer  
246 application (38.5 g).

## 247 **4. Discussion**

248 Our results indicate positive effects of AMF inoculation on raspberry yield that were  
249 independent of the effects of pollination and fertilizer application, and positive  
250 synergistic effects of pollination and fertilizer inputs on yield. AMF inoculation  
251 enhanced the fruit-producing potential of plants by increasing the number of  
252 developed flowers on top of the already positive effects on the per-plant flower  
253 production of fertilizer. Pollination subsequently increased the likelihood that these  
254 flowers developed into fruits but only when plants received enough fertilizers. This  
255 probably suggests that poorly fertilized plants have insufficient resources for  
256 maximum fruit set. Interestingly, at intermediate fertilizer levels, AMF inoculation  
257 also enhanced pollinator visitation rates suggesting intricate indirect effects of one  
258 ecosystem service on another. Our findings imply that the simultaneous management  
259 of below- and aboveground ecosystem services can substantially increase the yield-  
260 enhancing effects of fertilizer application and represent a compelling example of  
261 ecological enhancement *sensu* Bommarco *et al.* (2013).

### 262 **(a) AMF inoculation contributing to raspberry yield directly and indirectly**

263 AMF inoculation contributed to raspberry yield mainly through enhancing the number  
264 of flowers and by allowing plants to develop larger fruits. The 35% increase in fruit  
265 numbers of plants inoculated with AMF was very similar to the 33% increase in flower  
266 numbers of AMF inoculated plants, suggesting that AMF inoculation did not have a  
267 direct effect on fruit number but mostly on flower number. The effect on flower  
268 number may be due to the ability of AMF to increase plant nutrient concentrations  
269 (especially P and K) and to raise hormone levels stimulating bud-formation (Long *et al.*  
270 2010) which have both been observed to lead to the development of larger numbers of

271 flowers (Long *et al.* 2010). The positive effect of AMF inoculation on fruit size has  
272 been found in strawberry as well (Bona *et al.* 2015), but in our case the benefits were  
273 only expressed under ample fertilizer inputs (Fig. 3). Possibly, at low fertilizer  
274 application rates soil nutrient availability was the main limiting factor while at higher  
275 fertilizer application rates plant nutrient uptake capacity became a more limiting factor  
276 which AMF are known to improve. Surprisingly, when no fertilizer was applied,  
277 AMF-inoculated plants developed slightly smaller fruits than the plants that had not  
278 been inoculated, which could be the result of the competition for N with the host  
279 (Wang *et al.* 2018; Ingraffia *et al.* 2020). The interaction between AMF inoculation  
280 and fertilizer application did not carry over into final yield. Raspberry plants are  
281 readily colonized by AMF (Taylor & Harrier 2000) and it is to be expected that,  
282 regardless of treatment, all plants had formed associations with AMF to some degree  
283 by the end of the study. Our results therefore provide a conservative estimate of the  
284 potential contribution of AMF to raspberry crops.

285 Interestingly, our results indicate that AMF can also indirectly contribute to raspberry  
286 production through increasing pollinator flower visitation rate (Fig. 1) and thus  
287 pollination. Pollination has been shown to be an important factor limiting raspberry  
288 production, even in self-compatible cultivars like the one used in the present study  
289 (Chen *et al.* 2021). In our study, AMF and fertilizer inputs interactively shaped  
290 pollinator visitation rate (Fig. 1), and the pattern resembled their near-significant  
291 interaction on flower number ( $p = 0.059$ , Supplementary Fig. 1), which is an important  
292 plant trait to affect attractiveness to pollinators (Gange & Smith 2005). Therefore, it  
293 seems likely that the effects of AMF inoculation on pollinator visitation rate operated  
294 through their influence on flower number. However, we cannot rule out the possibility  
295 that AMF inoculation also influenced pollinator visitation rate through altering the  
296 composition of nectar and pollen (Somme *et al.* 2015; Bennett & Meek 2020).

### 297 (b) Synergistic effects of insect pollination and fertilizer on raspberry production

298 Insect pollination and fertilizer inputs showed synergistic effects on raspberry yield  
299 and our results indicate that both are necessary for maximal yield (Fig. 4a). The  
300 possible pathway to explain the interacting effects starts with the positive effect of  
301 fertilizer on flower number, which simultaneously increased both the number of

302 flowers that can potentially be pollinated and developed to fruits, as well as the  
303 attractiveness to pollinators (see Supplementary Fig. 2). Increased pollinator visitation  
304 rate generally enhances the transfer of pollen for ovule fertilization (Sáez *et al.* 2020),  
305 which may improve fruit set of the plants in the open pollination treatments (Fig. 2c).  
306 Interestingly, the benefits of insect pollination and fertilizer inputs seem to be  
307 depending on each other, as in the absence of the one, the benefits of the other  
308 diminish. For example, in the absence of fertilizer inputs, pollination benefits on fruit  
309 set are negligible, suggesting that nutrient availability limited the potential benefits of  
310 insect pollination to develop additional fruits (Garratt *et al.* 2018). Similarly, in the  
311 absence of insect pollination, solely increasing fertilizer inputs did not increase fruit  
312 set at all. This suggests that raspberry is probably limited by multiple 'resources' at the  
313 same time (Garibaldi *et al.* 2018), and that both need to be optimized to reach the  
314 highest raspberry crop yield. It also indicates that in our study system, ecosystem  
315 service benefits critically depend on the right management of external inputs and thus  
316 cannot easily replace them.

317 Because insect pollination did not influence single berry weight, the pollination-  
318 induced effects on fruit set carried over into similar effects on fruit number (Fig. 2e)  
319 and eventually yield (Fig. 4a). In a previous study using the same experimental system  
320 we did find positive effects of insect pollination on raspberry fruit size but not on fruit  
321 number (Chen *et al.* 2021). Plants have multiple ways to invest their most limiting  
322 resources (compensation mechanism; (Garratt *et al.* 2018)), which suggests that if one  
323 ecosystem service partially removes one limitation (e.g. nutrient-constrained flower  
324 development) this may impose new limitations to a subsequent process (e.g. nutrient-  
325 constrained drupelet development of raspberry fruits). However, it is noteworthy that  
326 regardless of the exact pathway, insect pollination resulted in substantially increased  
327 total raspberry crop yield in both studies.

### 328 (c) The potential of capitalizing on ecosystem services in farming systems

329 Our results highlight the importance of maintaining ecosystem service providing  
330 species in agro-ecosystems. Not only did we find that without pollination and AMF  
331 inoculation raspberry yield would be substantially reduced, but yield effects of  
332 fertilizer were much less pronounced in the absence of ecosystem services.

333 Agricultural production methods that do not consider potential adverse effects on  
334 ecosystem service providing species may risk shifting the system to one that is limited  
335 by delivery of ecosystem services rather than by management intensity (Deguines *et al.*  
336 2014; Fijen *et al.* 2020). This is not a trivial issue as, for example, AMF colonization  
337 may be adversely affected by application of some types of pesticides (Hernández-  
338 Dorrego & Parés 2010; Hage-Ahmed *et al.* 2019). A farmer trying to control a disease  
339 using fungicides may succeed in minimizing disease damage only to lose the benefits  
340 provided by AMF. Our results furthermore suggest that pro-actively managing for  
341 ecosystem services can even increase crop production independently of conventional  
342 management practices such as fertilizer application, or can enhance the yield increases  
343 due to such practices as here with pollination. Such an approach could address the  
344 increasing demands for safe and healthy food that is typically associated with crop  
345 production methods that rely on natural processes rather than external inputs (Yiridoe  
346 *et al.* 2005). Here we found additive and synergistic benefits of both of the ecosystem  
347 service providing species groups that we examined. Given that other species groups  
348 can have additional yield impacts through, for example, biological pest control or  
349 nutrient cycling, the ultimate benefits to agricultural production of capitalizing more  
350 on natural processes could be substantially higher.

## 351 [Acknowledgements](#)

352 We thank Lisa Kiel for her kind help with the pollinator observation. KC was funded  
353 by the China Scholarship Council (File No. 201706990023).

354

## 355 Reference:

356 1.

357 Aprea, E., Biasioli, F., Carlin, S., Endrizzi, I. & Gasperi, F. (2009). Investigation of Volatile Compounds in Two  
358 Raspberry Cultivars by Two Headspace Techniques: Solid-Phase Microextraction/Gas Chromatography–  
359 Mass Spectrometry (SPME/GC– MS) and Proton-Transfer Reaction– Mass Spectrometry (PTR– MS).  
360 *Journal of agricultural and food chemistry*, 57, 4011-4018.

361 2.

362 Bakhshandeh, S., Corneo, P.E., Mariotte, P., Kertesz, M.A. & Dijkstra, F.A. (2017). Effect of crop rotation on  
363 mycorrhizal colonization and wheat yield under different fertilizer treatments. *Agriculture, ecosystems &*  
364 *environment*, 247, 130-136.

365 3.

- 366 Bennett, A.E. & Meek, H.C. (2020). The influence of arbuscular mycorrhizal fungi on plant reproduction. *Journal of*  
367 *Chemical Ecology*, 46, 707-721.  
368 4.
- 369 Bommarco, R., Kleijn, D. & Potts, S.G. (2013). Ecological intensification: harnessing ecosystem services for food  
370 security. *Trends Ecol Evol*, 28, 230-238.  
371 5.
- 372 Bommarco, R., Marini, L. & Vaissière, B.E. (2012). Insect pollination enhances seed yield, quality, and market value  
373 in oilseed rape. *Oecologia*, 169, 1025-1032.  
374 6.
- 375 Bona, E., Lingua, G., Manassero, P., Cantamessa, S., Marsano, F., Todeschini, V. *et al.* (2015). AM fungi and PGP  
376 pseudomonads increase flowering, fruit production, and vitamin content in strawberry grown at low nitrogen  
377 and phosphorus levels. *Mycorrhiza*, 25, 181-193.  
378 7.
- 379 Bowles, T.M., Jackson, L.E., Loeher, M. & Cavagnaro, T.R. (2017). Ecological intensification and arbuscular  
380 mycorrhizas: a meta-analysis of tillage and cover crop effects. *Journal of Applied Ecology*, 54, 1785-1793.  
381 8.
- 382 Brundrett, M.C. & Tedersoo, L. (2018). Evolutionary history of mycorrhizal symbioses and global host plant diversity.  
383 *New Phytologist*, 220, 1108-1115.  
384 9.
- 385 Changey, F., Megloulou, H., Fontaine, J., Magnin-Robert, M., Tisserant, B., Lerch, T.Z. *et al.* (2019). Initial microbial  
386 status modulates mycorrhizal inoculation effect on rhizosphere microbial communities. *Mycorrhiza*, 29, 475-  
387 487.  
388 10.
- 389 Chen, K., Fijen, T.P., Kleijn, D. & Scheper, J. (2021). Insect pollination and soil organic matter improve raspberry  
390 production independently of the effects of fertilizers. *Agriculture, Ecosystems & Environment*, 309, 107270.  
391 11.
- 392 Chen, M., Arato, M., Borghi, L., Nouri, E. & Reinhardt, D. (2018). Beneficial services of arbuscular mycorrhizal  
393 fungi—from ecology to application. *Frontiers in Plant Science*, 9, 1270.  
394 12.
- 395 Costanza, R., d'Arge, R., De Groot, R., Farber, S., Grasso, M., Hannon, B. *et al.* (1997). The value of the world's  
396 ecosystem services and natural capital. *Nature*, 387, 253-260.  
397 13.
- 398 Dainese, M., Martin, E.A., Aizen, M.A., Albrecht, M., Bartomeus, I., Bommarco, R. *et al.* (2019). A global synthesis  
399 reveals biodiversity-mediated benefits for crop production. *Science advances*, 5, eaax0121.  
400 14.
- 401 Daubeney, H. & Kempler, C. (2003). 'Tulameen' red raspberry. *Journal of the American Pomological Society*, 57, 42.  
402 15.
- 403 Deguines, N., Jono, C., Baude, M., Henry, M., Julliard, R. & Fontaine, C. (2014). Large-scale trade-off between  
404 agricultural intensification and crop pollination services. *Frontiers in Ecology and the Environment*, 12, 212-  
405 217.  
406 16.
- 407 FAO (2018). Value of Agricultural Production. <http://www.fao.org/faostat/en/#data/OV>.  
408 17.
- 409 Fijen, T.P. & Kleijn, D. (2017). How to efficiently obtain accurate estimates of flower visitation rates by pollinators.  
410 *Basic and Applied Ecology*, 19, 11-18.  
411 18.
- 412 Fijen, T.P., Scheper, J.A., Boom, T.M., Janssen, N., Raemakers, I. & Kleijn, D. (2018). Insect pollination is at least as  
413 important for marketable crop yield as plant quality in a seed crop. *Ecology letters*, 21, 1704-1713.  
414 19.
- 415 Fijen, T.P., Scheper, J.A., Vogel, C., van Ruijven, J. & Kleijn, D. (2020). Insect pollination is the weakest link in the  
416 production of a hybrid seed crop. *Agriculture, Ecosystems & Environment*, 290, 106743.  
417 20.

- 418 Gange, A.C. & Smith, A.K. (2005). Arbuscular mycorrhizal fungi influence visitation rates of pollinating insects.  
419 *Ecological Entomology*, 30, 600-606.  
420 21.
- 421 Garibaldi, L.A., Andersson, G.K., Requier, F., Fijen, T.P., Hipólito, J., Kleijn, D. *et al.* (2018). Complementarity and  
422 synergisms among ecosystem services supporting crop yield. *Global food security*, 17, 38-47.  
423 22.
- 424 Garratt, M.P., Bishop, J., Degani, E., Potts, S.G., Shaw, R.F., Shi, A. *et al.* (2018). Insect pollination as an agronomic  
425 input: strategies for oilseed rape production. *Journal of Applied Ecology*, 55, 2834-2842.  
426 23.
- 427 Hage Ahmed, K., Rosner, K. & Steinkellner, S. (2019). Arbuscular mycorrhizal fungi and their response to pesticides.  
428 *Pest management science*, 75, 583-590.  
429 24.
- 430 Hernández-Dorrego, A. & Parés, J.M. (2010). Evaluation of some fungicides on mycorrhizal symbiosis between two  
431 *Glomus* species from commercial inocula and *Allium porrum* L. seedlings. *Spanish Journal of Agricultural*  
432 *Research*, 43-50.  
433 25.
- 434 Ingraffia, R., Amato, G., Sosa-Hernández, M.A., Frenda, A.S., Rillig, M.C. & Giambalvo, D. (2020). Nitrogen Type  
435 and Availability Drive Mycorrhizal Effects on Wheat Performance, Nitrogen Uptake and Recovery, and  
436 Production Sustainability. *Frontiers in plant science*, 11, 760.  
437 26.
- 438 IPBES (2016). The assessment report of the Intergovernmental Science-Policy Platform on Biodiversity and  
439 Ecosystem Services on pollinators, pollination and food production. (eds. Potts, SG, Imperatriz-Fonseca, V  
440 & Ngo, HT). Secretariat of the Intergovernmental Science-Policy Platform on Biodiversity and Ecosystem  
441 Services, Bonn, Germany, p. 552.  
442 27.
- 443 Jansa, J., Wiemken, A. & Frossard, E. (2006). The effects of agricultural practices on arbuscular mycorrhizal fungi.  
444 *Geological Society, London, Special Publications*, 266, 89-115.  
445 28.
- 446 Kleijn, D., Bommarco, R., Fijen, T.P., Garibaldi, L.A., Potts, S.G. & van der Putten, W.H. (2019). Ecological  
447 intensification: bridging the gap between science and practice. *Trends in ecology & evolution*, 34, 154-166.  
448 29.
- 449 Klein, A.-M., Vaissiere, B.E., Cane, J.H., Steffan-Dewenter, I., Cunningham, S.A., Kremen, C. *et al.* (2007).  
450 Importance of pollinators in changing landscapes for world crops. *Proceedings of the royal society B:*  
451 *biological sciences*, 274, 303-313.  
452 30.
- 453 Long, L.-K., Yao, Q., Huang, Y.-H., Yang, R.-H., Guo, J. & Zhu, H.-H. (2010). Effects of arbuscular mycorrhizal  
454 fungi on zinnia and the different colonization between *Gigaspora* and *Glomus*. *World Journal of*  
455 *Microbiology and Biotechnology*, 26, 1527-1531.  
456 31.
- 457 Pinheiro, J., Bates, D., DebRoy, S., Sarkar, D. & Team, R.C. (2019). nlme: Linear and Nonlinear Mixed Effects  
458 Models.  
459 32.
- 460 Plenchette, C., Clermont-Dauphin, C., Meynard, J. & Fortin, J. (2005). Managing arbuscular mycorrhizal fungi in  
461 cropping systems. *Canadian Journal of Plant Science*, 85, 31-40.  
462 33.
- 463 Pywell, R.F., Heard, M.S., Woodcock, B.A., Hinsley, S., Ridding, L., Nowakowski, M. *et al.* (2015). Wildlife-friendly  
464 farming increases crop yield: evidence for ecological intensification. *Proceedings of the Royal Society B:*  
465 *Biological Sciences*, 282, 20151740.  
466 34.
- 467 R Core Team (2020). R: A Language and Environment for Statistical Computing. R Foundation for Statistical  
468 Computing.  
469 35.

- 470 Sáez, A., Aizen, M.A., Medici, S., Viel, M., Villalobos, E. & Negri, P. (2020). Bees increase crop yield in an alleged  
471 pollinator-independent almond variety. *Scientific reports*, 10, 1-7.  
472 36.
- 473 Saini, I., Aggarwal, A. & Kaushik, P. (2019). Inoculation with mycorrhizal fungi and other microbes to improve the  
474 morpho-physiological and floral traits of *Gazania rigens* (L.) Gaertn. *Agriculture*, 9, 51.  
475 37.
- 476 Smith, S.E. & Read, D.J. (2010). *Mycorrhizal symbiosis*. Academic press.  
477 38.
- 478 Smith, S.E., Smith, F.A. & Jakobsen, I. (2004). Functional diversity in arbuscular mycorrhizal (AM) symbioses: the  
479 contribution of the mycorrhizal P uptake pathway is not correlated with mycorrhizal responses in growth or  
480 total P uptake. *New phytologist*, 162, 511-524.  
481 39.
- 482 Somme, L., Vanderplanck, M., Michez, D., Lombaerde, I., Moerman, R., Wathelet, B. *et al.* (2015). Pollen and nectar  
483 quality drive the major and minor floral choices of bumble bees. *Apidologie*, 46, 92-106.  
484 40.
- 485 Strik, B.C. (2005). A review of nitrogen nutrition of *Rubus*. In: *IX International Rubus and Ribes Symposium 777*, pp.  
486 403-410.  
487 41.
- 488 Tamburini, G., Bommarco, R., Kleijn, D., van der Putten, W.H. & Marini, L. (2019). Pollination contribution to crop  
489 yield is often context-dependent: A review of experimental evidence. *Agriculture, ecosystems & environment*,  
490 280, 16-23.  
491 42.
- 492 Tamburini, G., Bommarco, R., Wanger, T.C., Kremen, C., van der Heijden, M.G., Liebman, M. *et al.* (2020).  
493 Agricultural diversification promotes multiple ecosystem services without compromising yield. *Science*  
494 *advances*, 6, eaba1715.  
495 43.
- 496 Tamburini, G., Lami, F. & Marini, L. (2017). Pollination benefits are maximized at intermediate nutrient levels. *Proc*  
497 *Biol Sci*, 284.  
498 44.
- 499 Taylor, J. & Harrier, L. (2000). A comparison of nine species of arbuscular mycorrhizal fungi on the development and  
500 nutrition of micropropagated *Rubus idaeus* L. cv. Glen Prosen (Red Raspberry). *Plant and Soil*, 225, 53-61.  
501 45.
- 502 Wang, X.-X., Wang, X., Sun, Y., Cheng, Y., Liu, S., Chen, X. *et al.* (2018). Arbuscular mycorrhizal fungi negatively  
503 affect nitrogen acquisition and grain yield of maize in a N deficient soil. *Frontiers in microbiology*, 9, 418.  
504 46.
- 505 Williams, P.H., Brown, M.J., Carolan, J.C., An, J., Goulson, D., Aytekin, A.M. *et al.* (2012). Unveiling cryptic species  
506 of the bumblebee subgenus *Bombus* s. str. worldwide with COI barcodes (Hymenoptera: Apidae).  
507 *Systematics and Biodiversity*, 10, 21-56.  
508 47.
- 509 Wolfe, B.E., Husband, B.C. & Klironomos, J.N. (2005). Effects of a belowground mutualism on an aboveground  
510 mutualism. *Ecology Letters*, 8, 218-223.  
511 48.
- 512 Yiridoe, E.K., Bonti-Ankomah, S. & Martin, R.C. (2005). Comparison of consumer perceptions and preference toward  
513 organic versus conventionally produced foods: A review and update of the literature. *Renewable agriculture*  
514 *and food systems*, 193-205.  
515 49.
- 516 Zhang, S., Lehmann, A., Zheng, W., You, Z. & Rillig, M.C. (2019). Arbuscular mycorrhizal fungi increase grain  
517 yields: A meta-analysis. *New Phytologist*, 222, 543-555.  
518 50.
- 519 Zuur, A., Ieno, E.N., Walker, N., Saveliev, A.A. & Smith, G.M. (2009). *Mixed effects models and extensions in*  
520 *ecology with R*. Springer Science & Business Media.
- 521



## Tables

**Table 1** Effects of arbuscular mycorrhizal fungi (AMF; inoculated vs non-inoculated), pollination (open-pollinated vs pollinators excluded) and fertilizer application rates (0, 33, 66, 99 kg N·ha<sup>-1</sup>·year<sup>-1</sup>) on flower visitation rate (open-pollinated plants only, n=37) and raspberry fruit production variables (n=76). All analyses were performed using linear mixed-effects models. Bold values represent significant effects (P<0.05).

|                              | Flower visitation rate |              | Flower number  |                  | Fruit set      |              | Fruit number   |                  | Single berry weight |              | Yield          |                  |
|------------------------------|------------------------|--------------|----------------|------------------|----------------|--------------|----------------|------------------|---------------------|--------------|----------------|------------------|
|                              | $\chi^2_{(1)}$         | P            | $\chi^2_{(1)}$ | P                | $\chi^2_{(1)}$ | P            | $\chi^2_{(1)}$ | P                | $\chi^2_{(1)}$      | P            | $\chi^2_{(1)}$ | P                |
| AMF                          | 2.096                  | 0.148        | 8.074          | <b>0.004</b>     | 0.007          | 0.933        | 5.436          | <b>0.020</b>     | 0.277               | 0.599        | 7.712          | <b>0.005</b>     |
| Pollination                  |                        |              | 0.022          | 0.881            | 9.093          | <b>0.003</b> | 6.916          | <b>0.009</b>     | 2.083               | 0.149        | 10.165         | <b>0.001</b>     |
| Fertilizer                   | 5.394                  | <b>0.020</b> | 19.934         | <b>&lt;0.001</b> | 0.944          | 0.331        | 14.059         | <b>&lt;0.001</b> | 8.725               | <b>0.003</b> | 23.003         | <b>&lt;0.001</b> |
| Fertilizer^2                 | 0.396                  | 0.529        | 1.807          | 0.179            | 2.277          | 0.131        | 2.600          | 0.107            | 0.885               | 0.347        | 1.186          | 0.276            |
| AMF:fertilizer               | 0.284                  | 0.594        | 0.290          | 0.590            | 0.309          | 0.578        | 0.002          | 0.966            | 4.146               | <b>0.042</b> | 1.170          | 0.279            |
| AMF:fertilizer^2             | 5.234                  | <b>0.022</b> | 3.565          | 0.059            | 0.577          | 0.448        | 0.607          | 0.436            | 1.164               | 0.281        | 0.324          | 0.569            |
| AMF:pollination              |                        |              | 0.071          | 0.790            | 0.375          | 0.540        | 0.040          | 0.841            | 0.140               | 0.708        | 0.552          | 0.458            |
| Pollination:fertilizer       |                        |              | 0.054          | 0.817            | 8.517          | <b>0.004</b> | 4.699          | <b>0.030</b>     | 0.390               | 0.532        | 8.705          | <b>0.003</b>     |
| Pollination:fertilizer^2     |                        |              | 0.686          | 0.407            | 0.616          | 0.432        | 0.116          | 0.734            | 0.790               | 0.374        | 0.229          | 0.632            |
| AMF:fertilizer:pollination   |                        |              | 0.350          | 0.554            | 3.412          | 0.065        | 0.577          | 0.447            | 0.025               | 0.874        | 0.231          | 0.631            |
| AMF:fertilizer^2:pollination |                        |              | 0.174          | 0.677            | 1.218          | 0.270        | 0.026          | 0.873            | 3.228               | 0.072        | 0.339          | 0.560            |

## Figures

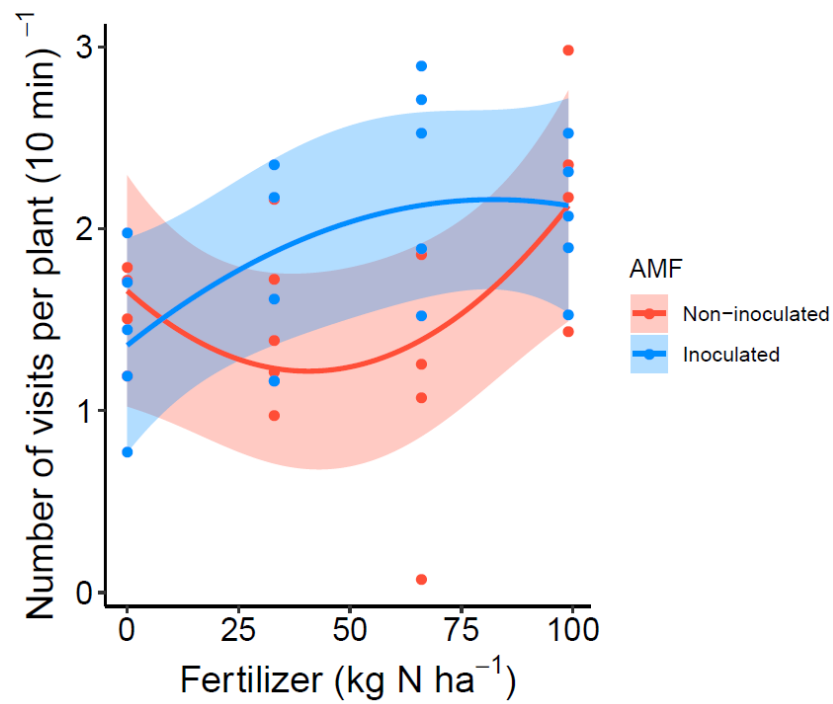

Fig. 1. Interactive effects of AMF inoculation and fertilizer application rates on flower visitation rate (number of visits per 10 min) of raspberry. The lines are predicted by the minimum adequate model; shadings show the 95% confidence interval, and points represent partial residuals.

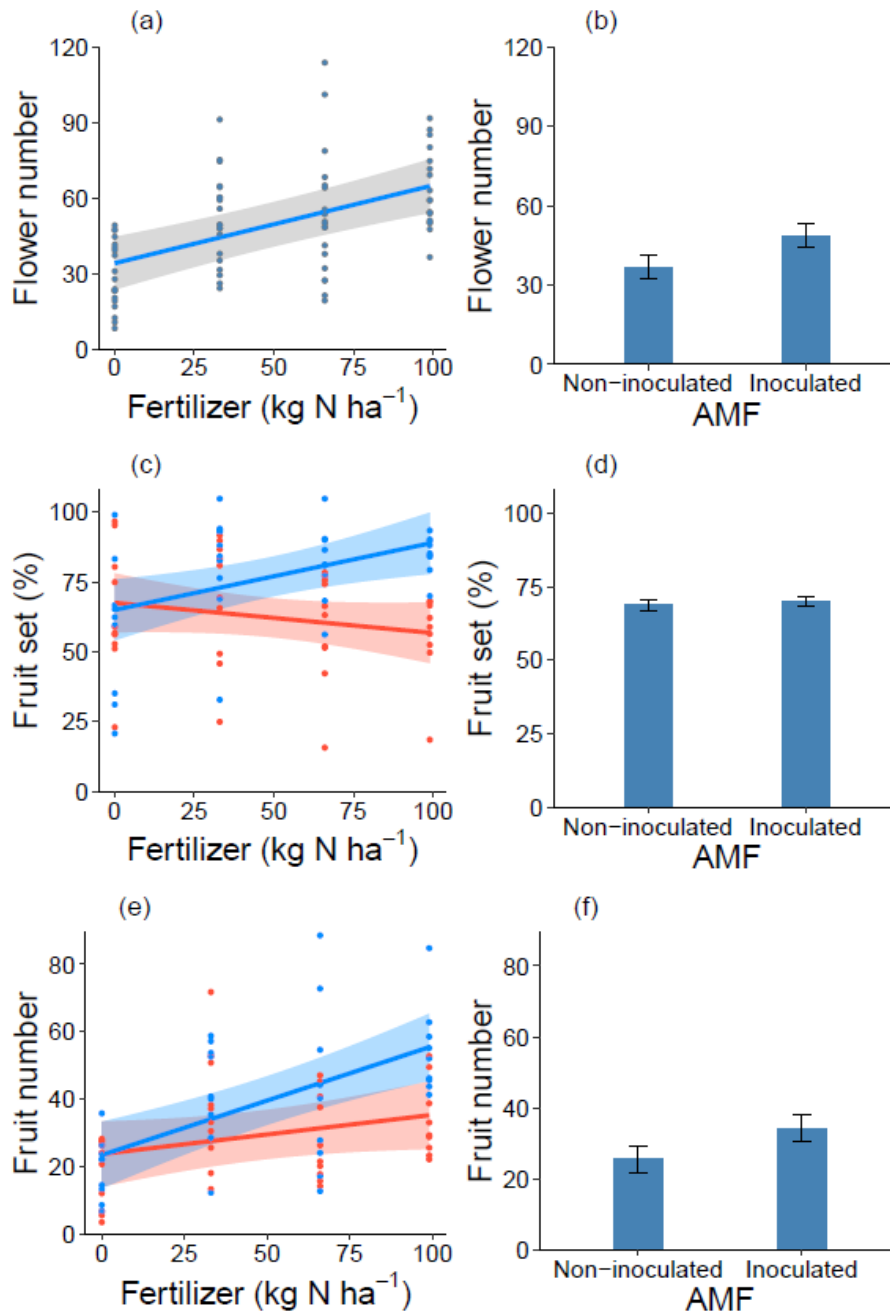

Fig. 2. Effects of AMF inoculation, pollination and fertilizer application rates on flower number (a and b), fruit set (c and d), and fruit number (e and f) per plant. Pollination treatments are indicated by color in (c) and (e), pollinator excluded treatment in red and open pollination treatment in blue. Graphs show predicted values of the minimum adequate models; panel (d) shows non-significant estimated mean fruit set for AMF treatments as calculated in a model including AMF treatment ( $p=0.93$ ) and the minimum adequate model parameters, and is shown for completeness. Shadings show the 95% confidence interval, and points represent partial residuals; error bars show  $\pm 1$  S.E.

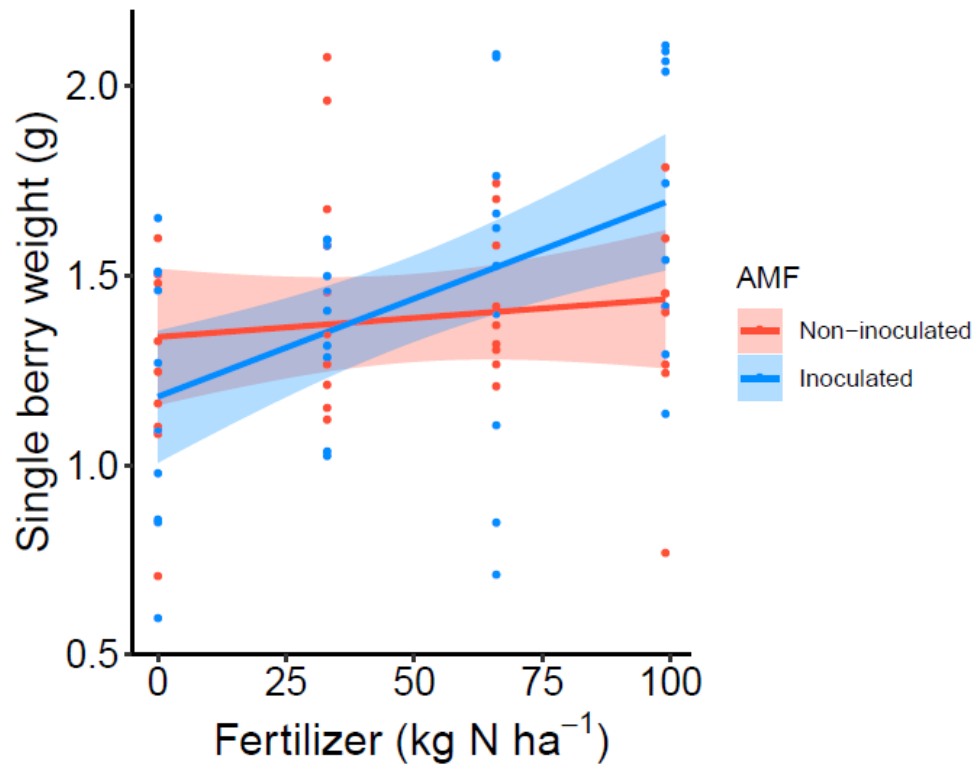

Fig. 3. Interactive effects of AMF inoculation and fertilizer application rates on average single berry weight (g) per plant. The lines are predicted by the minimum adequate model; shadings show the 95% confidence interval, and points represent partial residuals.

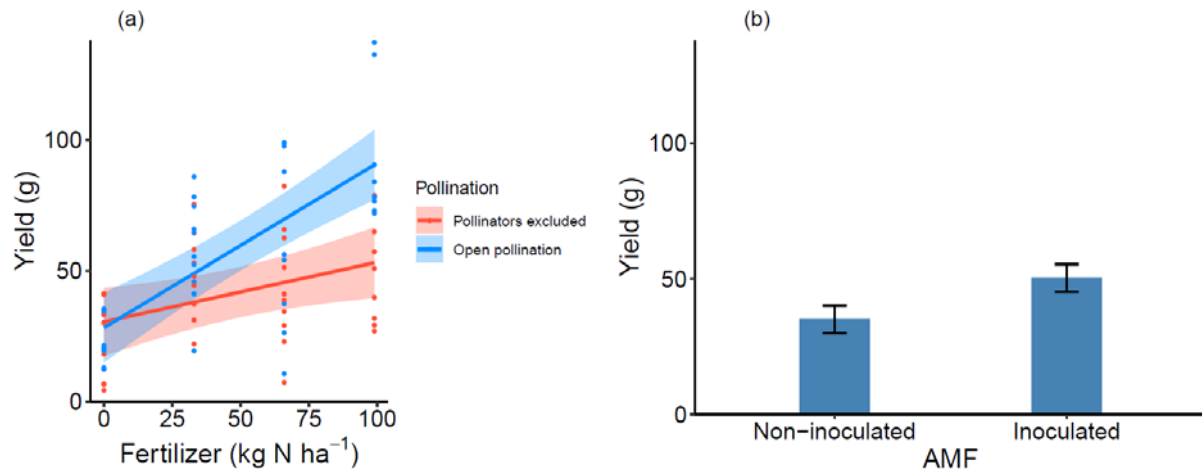

Fig. 4. Effects of a) fertilizer application rates and pollination, b) AMF inoculation on yield per plant. Graphs show predicted values of the minimum adequate model (both); shadings show the 95% confidence interval, and points represent partial residuals (a); error bars show  $\pm 1$  S.E (b).

## Supplementary materials

Supplementary Table 1. The number of replicated raspberry plants survived in each treatment combination.

| Pollination          | Fertilizer (kg·ha <sup>-1</sup><br>of N per year) | AMF            | No. plants survived |
|----------------------|---------------------------------------------------|----------------|---------------------|
| Pollinators excluded | 0                                                 | Non-inoculated | 5                   |
| Pollinators excluded | 0                                                 | Inoculated     | 5                   |
| Pollinators excluded | 33                                                | Non-inoculated | 5                   |
| Pollinators excluded | 33                                                | Inoculated     | 5                   |
| Pollinators excluded | 66                                                | Non-inoculated | 5                   |
| Pollinators excluded | 66                                                | Inoculated     | 5                   |
| Pollinators excluded | 99                                                | Non-inoculated | 5                   |
| Pollinators excluded | 99                                                | Inoculated     | 4                   |
| Open pollination     | 0                                                 | Non-inoculated | 4                   |
| Open pollination     | 0                                                 | Inoculated     | 5                   |
| Open pollination     | 33                                                | Non-inoculated | 5                   |
| Open pollination     | 33                                                | Inoculated     | 5                   |
| Open pollination     | 66                                                | Non-inoculated | 4                   |
| Open pollination     | 66                                                | Inoculated     | 5                   |
| Open pollination     | 99                                                | Non-inoculated | 4                   |
| Open pollination     | 99                                                | Inoculated     | 5                   |

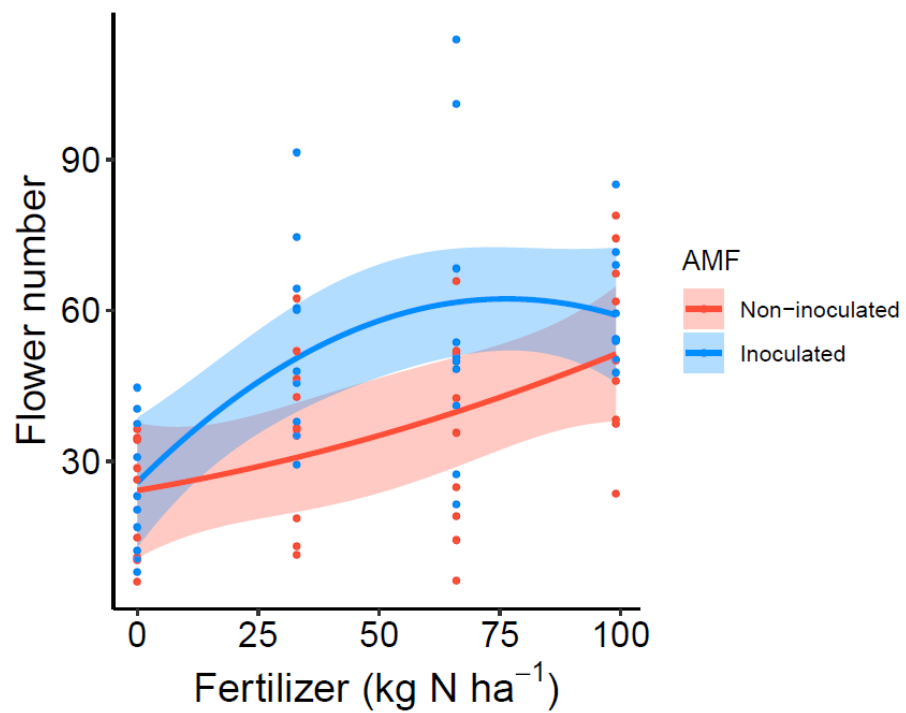

Supplementary Fig. 1. Interactive effects of AMF inoculation and fertilizer application rates on flower number per plant (near significant interaction,  $p=0.059$ ). The lines are predicted by the minimum adequate model; shadings show the 95% confidence interval, and points represent partial residuals.

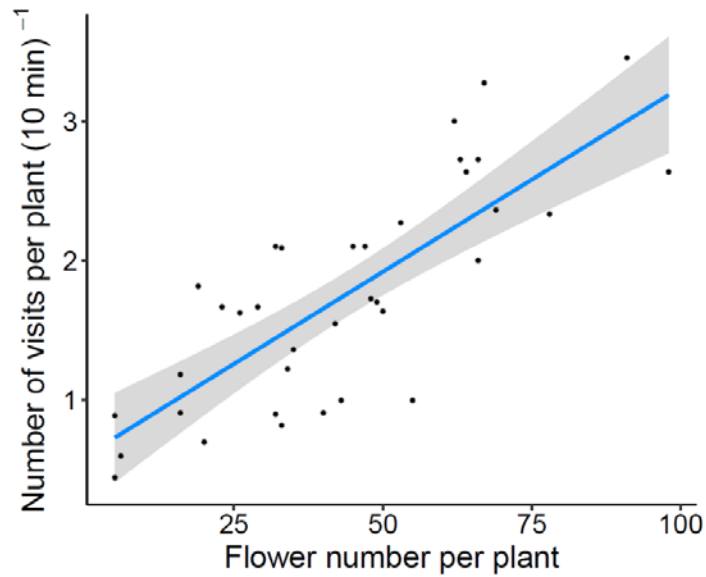

Supplementary Fig. 2. The relation between flower number and flower visitation rate (number of visits per 10 min) per plant, with the shading showing the 95% confidence interval. The graph bases on a simple linear regression model and the equation is  $y = 0.60 + 0.03x$ : ( $r^2 = 0.61$ ,  $p < 0.001$ )
